# Supplementary material for: The colorimetry and smartphone determination of perfluorooctane sulfonate based on cytidine 5′-monophosphate-capped gold nanoclusters with peroxidase-like activity
Source: Royal Society of Chemistry journal article supplement (doi:10.1039/d3an00763d), 2023-01-01
Supplement: d3an00763d1.pdf [file d3an00763d1.pdf]

**The colorimetry and smartphone determination of perfluorooctane sulfonate  
based on a cytidine 5'-monophosphate-capped gold nanoclusters with  
peroxidase-like activity**

Tian-Yuan Guo,<sup>a,b</sup> Hong-Wei Li,<sup>a,b</sup> Chun-Xia Zhang<sup>a,b</sup>, and Yuqing Wu<sup>\*a,b</sup>

<sup>a</sup> *State Key Laboratory of Supramolecular Structure and Materials, College of Chemistry, Jilin University,  
No. 2699 Qianjin Street, Changchun 130012, P. R. China*

<sup>b</sup> *Institute of Theoretical Chemistry, College of Chemistry, Jilin University, No. 2 Liutiao Road,  
Changchun 130023, P. R. China*

*\*Corresponding authors. E-mail addresses: yqw@jlu.edu.cn; Tel: +86-431-85168730*

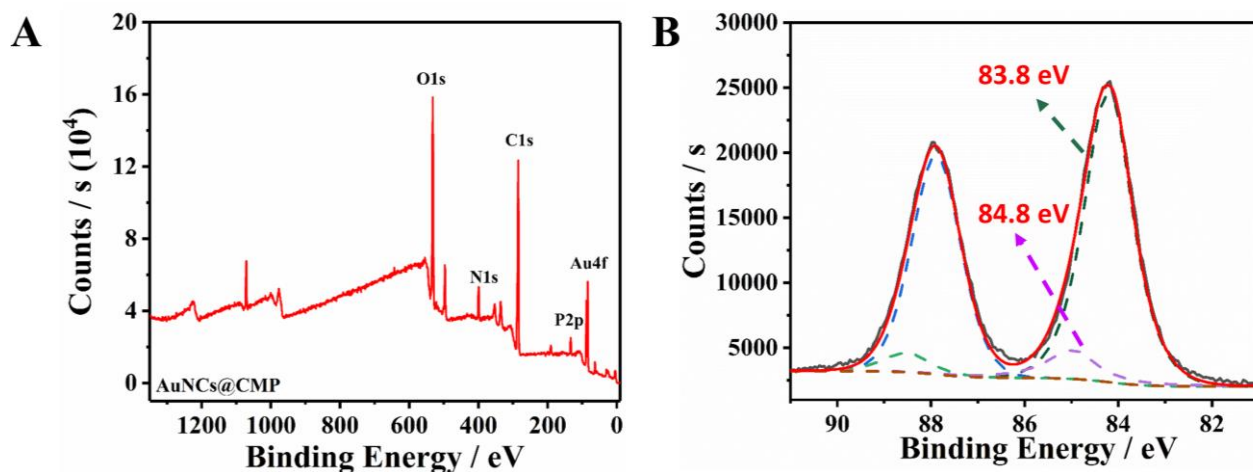

**Fig. S1** XPS spectra of (A) AuNCs@CMP and (B) Au4f in the AuNCs@CMP, respectively.

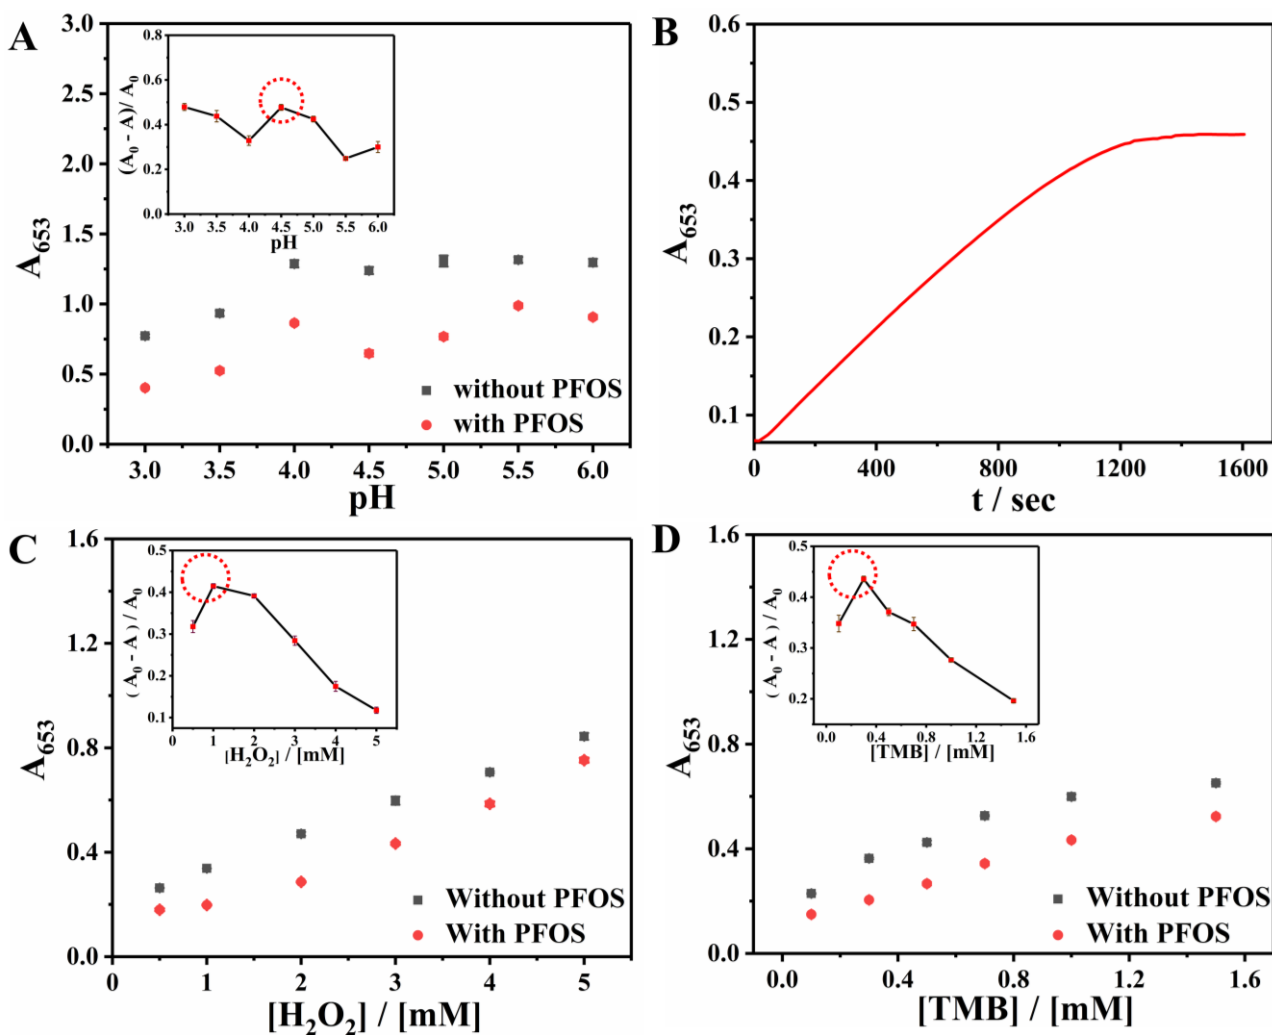

**Fig. S2** The catalytic activity changes of the AuNCs/H<sub>2</sub>O<sub>2</sub>/TMB system at different (A) pH; (B) reaction time, the concentrations of (C) H<sub>2</sub>O<sub>2</sub>; (D) TMB, in the absence and presence of PFOS (50 μM). The insets are magnitude of the absorbance reduction,  $(A_0 - A)/A_0$ , induced by PFOS at different conditions.

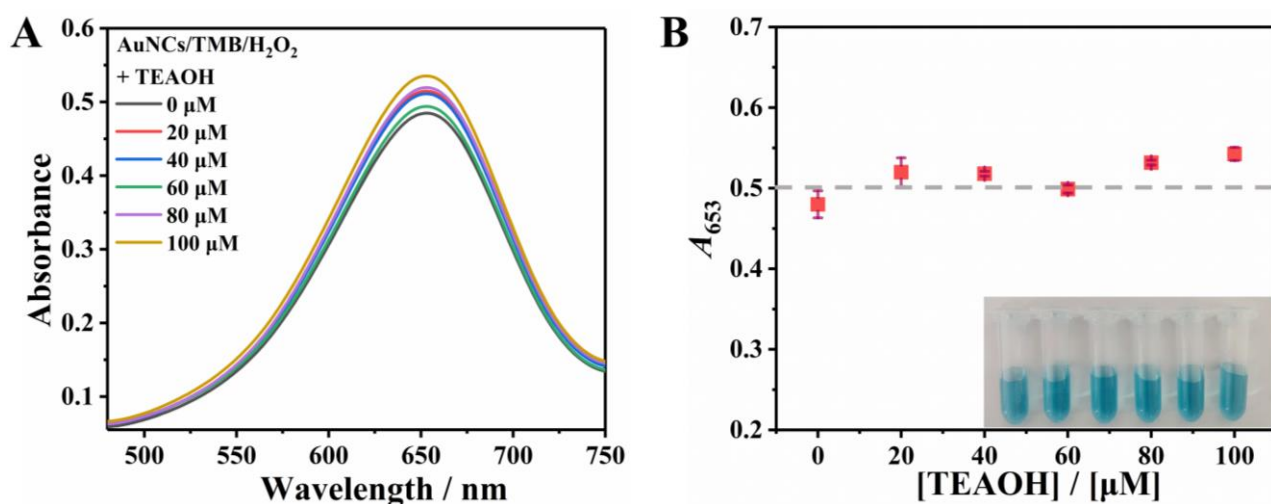

**Fig. S3** (A) UV-Vis absorption spectra of the AuNCs/H<sub>2</sub>O<sub>2</sub>/TMB system in the presence of different concentrations of TEAOH (0-100 μM). (B) Plot of the corresponding values of A<sub>653</sub> in the presence of different amounts of TEAOH (0-100 μM).

**Table S1** Parameters for the PFOS determination in the tap water or soil extracts, respectively

| Samples & Nos | Spiked (μM) | Examined (μM) | Recovery (%)  | RSD (%) |       |
|---------------|-------------|---------------|---------------|---------|-------|
| (n=5)         |             |               |               |         |       |
| tap water     | #1          | 20.00         | 19.88 ± 0.299 | 99.40   | 1.506 |
|               | #2          | 30.00         | 30.12 ± 0.360 | 100.4   | 1.195 |
|               | #3          | 40.00         | 40.08 ± 0.688 | 100.2   | 1.717 |
| soil extract  | #4          | 20.00         | 19.72 ± 0.204 | 98.60   | 1.034 |
|               | #5          | 30.00         | 29.76 ± 1.029 | 99.20   | 3.456 |
|               | #6          | 40.00         | 39.44 ± 1.228 | 98.20   | 3.116 |

**Table S2** Comparison of the analytical performance of different methodologies towards PFOS detection.

| Materials                                        | Methodology                            | LOD     | Linear range  | Distinguishing<br>PFOS/PFOA | Ref.      |
|--------------------------------------------------|----------------------------------------|---------|---------------|-----------------------------|-----------|
| MIP@TiO <sub>2</sub> nanotube                    | Photoelectrochemical<br>assay          | 160 nM  | 0.5 - 10 μM   | no                          | [S1]      |
| GC5A-6C•FI                                       | Fluorescence                           | 21.4 nM | 0 - 0.6μM     | no                          | [S2]      |
| Erythrosine B-siloxane                           | Fluorescence                           | 4.65 μM | 0 - 30 μM     | yes                         | [S3]      |
|                                                  |                                        | 2.7 μM  | 30 - 65μM     |                             |           |
| Janus Green B                                    | Resonance light scattering             | 5.6 nM  | 0.05 - 9.0μM  | yes                         | [S4]      |
| toluidine blue                                   | Rayleigh scattering and<br>Colorimetry | 112 nM  | 1 - 20 μM     | yes                         | [S5]      |
| MoS <sub>2</sub> /Fe <sub>3</sub> O <sub>4</sub> | Colorimetry                            | 8.6 nM  | 0.1 - 12.5 μM | no                          | [S6]      |
| CoNCN                                            | Colorimetry                            | 20 nM   | 0.01 - 100 μM | no                          | [S7]      |
| Au@PEG-F NPs                                     | Colorimetry                            | 20 nM   | 0.02 - 2 μM   | no                          | [S8]      |
| PAD (methylene green)                            | Colorimetry                            | 15.9 μM | —             | no                          | [S9]      |
| AuNCs/H <sub>2</sub> O <sub>2</sub> /TMB         | Colorimetry                            | 150 nM  | 2 - 50 μM     | yes                         | This Work |

## References

- S1. T. T. Tran, J. Li, H. Feng, J. Cai, L. Yuan, N. Wang and Q. Cai, *Sens. Actuators B Chem.*, 2014, 190, 745-751.
- S2. Z. Zheng, H. Yu, W.-C. Geng, X.-Y. Hu, Y.-Y. Wang, Z. Li, Y. Wang and D.-S. Guo, *Nat. Commun.*, 2019, 10, 5762.
- S3. W. Lin, Z. Gou, A. Wang, X. Zhang and Y. Zuo, *Sens. Actuators B Chem.*, 2022, 367, 132017.
- S4. Z. Cheng, F. Zhang, X. Chen, L. Du, C. Gao and K. Tan, *Anal. Methods*, 2016, 8, 8042-8048.
- S5. J. He, P. Qiu, J. Song, S. Zhang and Y. Bai, *Anal. Bioanal. Chem.*, 2020, 412, 5329-5339.
- S6. J. Liu, J. Du, Y. Su and H. Zhao, *Microchem. J.*, 2019, 149, 104019.
- S7. Y. Li, Y. Lu, X. Zhang, H. Cao and Y. Huang, *Microchem. J.*, 2022, 181, 107814.
- S8. H. Niu, S. Wang, Z. Zhou, Y. Ma, X. Ma and Y. Cai, *Anal. Chem.*, 2014, 86, 4170-4177.

S9. R. F. Menger, J. J. Beck, T. Borch and C. S. Henry, *Acs Es&T Water*, 2022, 2, 565-572.
